# Supplementary material
Source: Springer Nature journal article supplement (https://www.springermedizin.de/resource/supplementary/13058_2013_3568_MOESM6_ESM.pdf/9703656)

# Prognostic Association in ER-Defined Subtypes

13,091 genes measured on 2,731 patients

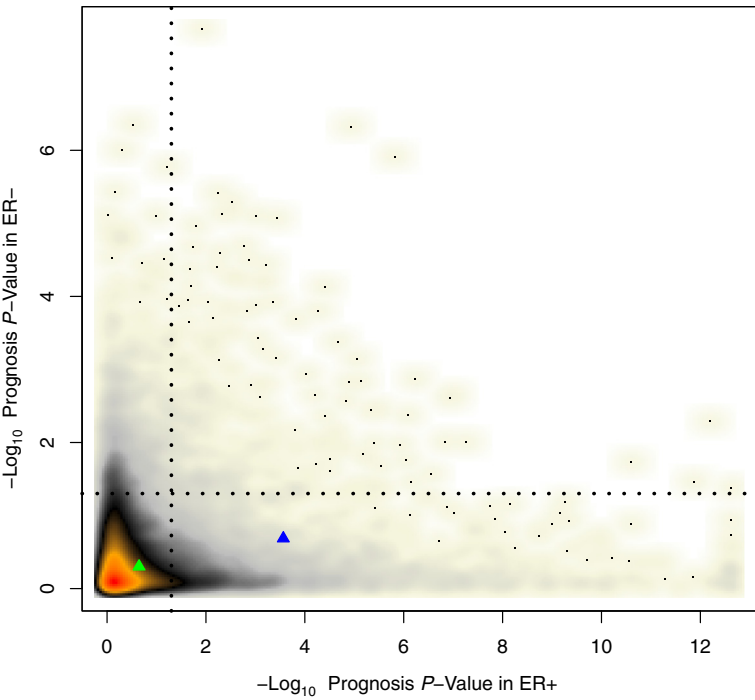

Supplement: MOESM6 [file 9703656]
